# 1 **Improving bioinformatics prediction of microRNA targets** 2 **by ranks aggregation**

3

4 Aurélien Quillet<sup>1</sup>, Chadi Saad<sup>1, #a¶</sup>, Gaëtan Ferry<sup>2¶</sup>, Youssef Anouar<sup>1</sup>, Nicolas Vergne<sup>3</sup>,  
5 Thierry Lecroq<sup>2</sup> and Christophe Dubessy<sup>1\*</sup>

6

7 <sup>1</sup>Normandie Univ, UNIROUEN, INSERM, U1239, Laboratoire Différenciation et  
8 Communication Neuronale et Neuroendocrine, Institut de Recherche et d'Innovation  
9 Biomédicale de Normandie, 76000 Rouen, France.

10 <sup>2</sup>Normandie Univ, UNIROUEN, Laboratoire d'Informatique du Traitement de  
11 l'Information et des Systèmes, Institut de Recherche et d'Innovation Biomédicale de  
12 Normandie, 76000 Rouen, France.

13 <sup>3</sup>Normandie Univ, UNIROUEN, CNRS, UMR6085, Laboratoire de Mathématiques  
14 Raphaël de Salem, 76000 Rouen, France.

15

16 \*Corresponding Author

17 E-mail: [christophe.dubessy@univ-rouen.fr](mailto:christophe.dubessy@univ-rouen.fr)

18

19 ¶¶These authors contributed equally to this work.

20

21 #aCurrent Address: Research center in Computer Science, Signal and Automatic  
22 Control of Lille (CRIS<sup>t</sup>AL). UMR CNRS 9189 – University of Lille 1 – INRIA, University  
23 of Lille 1, 59655 Villeneuve d'Ascq, France.

## 24 **Abstract**

25 microRNAs are non-coding RNAs which down-regulate a large number of target  
26 mRNAs and modulate cell activity. Despite continued progress, bioinformatics  
27 prediction of microRNA targets remains a challenge since available softwares still  
28 suffer from a lack of accuracy and sensitivity. Moreover, these tools show fairly  
29 inconsistent results from one another. Thus, in an attempt to circumvent these  
30 difficulties, we aggregated all human results of three important prediction algorithms  
31 (miRanda, PITA and SVMicrO) showing additional characteristics in order to rerank  
32 them into a single list. This database is freely available through a webtool called  
33 miRabel (<http://bioinfo.univ-rouen.fr/mirabel/>) which can take either a list of miRNAs,  
34 genes or signaling pathways as search inputs. Receiver Operating Characteristic  
35 curves and Precision-Recall curves analysis carried out using experimentally validated  
36 data and very large datasets show that miRabel significantly improves the prediction  
37 of miRNA targets compared to the three algorithms used separately. Moreover, using  
38 the same analytical methods, miRabel shows significantly better predictions than other  
39 popular algorithms such as MBSTAR and miRWalk. Interestingly, a F-score analysis  
40 revealed that miRabel also significantly improves the relevance of the top results. The  
41 aggregation of results from different databases is therefore a powerful and  
42 generalizable approach to many other species to improve miRNA target predictions.  
43 Thus, miRabel is an efficient tool to accurately identify miRNA targets and integrate  
44 them into a biological context.

## 45 **Introduction**

46 Mature microRNAs (miRNAs) are unpolyadenylated and uncapped 21-23 nucleotides  
47 endogenous non-coding single strand RNAs. They act at the post-transcriptional level  
48 to regulate gene expression in eukaryotic organisms. At least 60% of human genes  
49 are believed to be regulated by miRNAs as shown by a genome wide analysis [1].  
50 Since their discovery in 1993 [2], it has been clearly established that miRNAs act as  
51 key regulators of several cell processes such as proliferation, differentiation,  
52 metabolism and apoptosis [3]; it is therefore not surprising to find them involved in  
53 numerous pathophysiological processes [4]. To date, 2,588 mature miRNAs  
54 (<http://www.mirbase.org/>) have been identified in human and each of them has the  
55 ability to potentially regulate several hundred of target mRNAs and each targeted  
56 mRNA can be regulated by tens of miRNAs [5], thus creating a large and complex  
57 regulation network of gene expression unsuspected before. They work mostly through  
58 imperfect base-pairing hybridization to mRNA, generally in the 3'-UTR [6], to block  
59 translation or rarely to induce mRNA degradation [7]. Moreover, it was shown that  
60 miRNA binding sites are also found in the 5'-UTR and in the coding region [8]. The  
61 bioinformatics identification of miRNA targets remains a challenge because  
62 mammalian miRNAs are characterized by a poor homology toward their target  
63 sequence except in the conserved "seed" region that mostly comprises nucleotides 2-  
64 7 of the miRNA [9]. Nevertheless, several algorithms have been developed in recent  
65 years in order to include a set of features known to modulate the interaction between  
66 miRNA and their cognate mRNA in addition to the essential Watson-Crick pairings [10].  
67 Among them, the most relevant are the free energy of the miRNA::mRNA system [11],  
68 the conservation of sequences among species [12] and the accessibility of binding  
69 sites [13]. This resulted in the creation of more than 105 target prediction tools (as of

70 November 2017, from OMICtools' database [14]), all of which have their strengths and  
71 weaknesses [15, 16]. These tools are useful to reduce the amount of potential targets  
72 in order to streamline the experimental validations [17]. However, their predictions  
73 suffer from a poor accuracy and sensitivity as revealed by experimental data [18, 19].  
74 In addition, computational results are very divergent depending on how the  
75 bioinformatics tools take into account the aforementioned features of miRNA::mRNA  
76 interactions [20]. Moreover, several studies clearly show that algorithms performances  
77 depend on the dataset used [21, 22]. So far, no single method consistently outperforms  
78 others in the miRNA targets prediction field, thus supporting the idea that databases  
79 content combination is an efficient way to improve MTI prediction. Assuming that an  
80 interaction predicted by more than one algorithm is more likely to be functional,  
81 databases such as miRWalk [23, 24], miRSystem [25], miRGator [26] or, more  
82 recently, Tools4miRs [27], store and/or compare results predicted by several popular  
83 tools using statistics and mRNA/protein expression data. Ritchie et al. [28], however,  
84 demonstrated that targets resulting from the intersection of two lists of predictions are  
85 not more likely to be present in the intersection of two other lists. Therefore, intersecting  
86 results does not increase the probability of retaining true positives. Moreover,  
87 approaches based on intersection of predictions may lead to decreased sensitivity  
88 because of possibly omitting valid interactions as shown by Sethupathy et al. [29]. In  
89 order to circumvent these limitations, we proposed to compute a new unique score  
90 based on the aggregation of the interaction ranks taken from other well known  
91 prediction algorithms. To test our hypothesis, we aggregated three major prediction  
92 algorithm results which enabled us to show that this new score significantly improves  
93 miRNA targets prediction compared to other prediction tools. To allow a more  
94 comprehensive analysis, the results of this aggregation were eventually linked to their

95 respective cellular pathways using KEGG database, and implemented in a web tool  
96 named miRabel. Interestingly, miRabel can take either a list of miRs, genes or  
97 pathways as search inputs and retrieve the linked results.

## 98 **Materials and methods**

### 99 **Aggregated databases**

100 Computationally predicted human miRNA::mRNA interaction databases generated by  
101 miRanda [30], PITA [31] and SVMicrO [32] were used. These publicly available online  
102 algorithms have been chosen because each of them uses different and complementary  
103 features of miRNA::mRNA interactions such as seed match, interspecies conservation,  
104 free energy, site accessibility and target-site abundance (Table S1) [10]. The ranks of  
105 each predicted interaction retrieved from one or more of these databases have been  
106 aggregated using the R package RobustRankAggreg (RRA) (v1.1) [33] with R (v3.2.0).  
107 The new score resulting from the aggregation is used to re-rank each interaction and  
108 also indicates the significance of the proposed rank in miRabel.

### 109 **Testing datasets**

110 Two types of testing datasets were used for each of the comparisons described in this  
111 paper. First, to compare the different aggregation methods, we used one million  
112 randomly selected interactions within aggregated data. Validated interactions  
113 accounted for 3% of the testing dataset. For the other evaluations, all common  
114 interactions between compared databases were used (Fig.1A). It resulted in extremely  
115 large datasets (>500,000 interactions) which reduced the amount of possible analysis  
116 due to computation time (several weeks). This led us to design a second type of  
117 datasets of 50,000 interactions randomly picked from the corresponding larger dataset.

118 For each large dataset, 10 smaller ones were created (Fig.1B). The amount of  
119 experimentally validated interactions within these randomly picked ones was set so as  
120 to remain close in proportion to the main, larger dataset. These smaller datasets  
121 allowed us to increase the relevance and statistical significance of performance results.

## 122 **Performance analysis methods**

123 On each dataset, a receiver operating characteristic (ROC) analysis was done using  
124 the area under curve (ROC\_AUC) as implemented in the R package pROC [34]. To  
125 analyse top prediction results, a specificity of 90% was set as a threshold in order to  
126 compute partial ROC (pROC<sub>90%</sub>) and the corresponding AUC (ROC\_pAUC<sub>90%</sub>) and  
127 sensitivity. To focus on which classifier better identifies true positive interactions,  
128 datasets were further compared with precision and recall (PR) curves using R  
129 programming as well. For the same purpose as with the pAUC of the ROC analysis,  
130 we calculated the harmonic mean between the precision and the recall (F-score) for  
131 different percentages of the top interactions.

## 132 **Statistics**

133 Statistical analysis of results obtained with smaller datasets were done using either a  
134 Repeated Measures One Way ANOVA with Dunnett's post-test or a Student t-test  
135 depending on the number of compared groups with GraphPad Prism software (version  
136 6.00 for Windows, GraphPad Software, La Jolla California USA).

## 137 **Results**

### 138 **miRabel overview**

139 **miRabel : a database for microRNA target predictions**

140 The database was designed with MySQL (<http://www.mysql.com/>) using InnoDB motor  
141 and includes predictions from miRanda [30], PITA (v.6.0) [31] and SVMicrO [32]. It  
142 contains tables for the 2,578 human miRNAs (for which 1,107 have target mRNAs),  
143 20,532 genes and 275 pathways. This represents more than 8.6 million predicted  
144 interactions from which 123,373 are experimentally established. These experimentally  
145 validated interactions are taken from miRTarBase (v.6.0) [35] and miRecords [36],  
146 whereas 5'UTR and CDS predictions are retrieved from miRWalk database (v.2.0) [24].  
147 Genes and pathways information as well as their relationships were retrieved from  
148 KEGG's database while miRNA data were from miRBase (release 21,  
149 <http://www.mirbase.org/>) and linked with miRNA target predictions. Since the  
150 annotation of miRNAs has changed in the past few years, a conversion tool was  
151 developed to automatically convert the names of miRNA queries in the latest version  
152 used by miRBase. This tool is also accessible from the home page. In order to  
153 standardize gene names from the different tools, they were converted to the NCBI  
154 gene ID and a table containing their synonyms has been built. Potential interactions  
155 between miRNAs and genes were obtained based on our prediction method  
156 represented as shown in Fig. 2A. Pathways linked to the resulting interactions can be  
157 retrieved and ranked according to the proportion of its interactions regulated by a given  
158 miRNA. The number of validated interactions for this miRNA present in each pathway  
159 is also indicated.

## 160 **The web interface**

161 The web interface was designed with PHP (<http://www.php.net>) and CSS (<http://www.cssflow.com/>). It enables users to query the system directly by miRNA  
162 name, by gene name or by pathway name (Fig. 2B). Multiple queries are allowed in  
163 order to identify common miRNAs, genes or pathways among the results. Alternatively,  
164

165 miRabel can be queried by uploading a text file containing the same information.  
166 Queries by pathways are easily made thanks to asynchronous database queries and  
167 name completion. The results are visualized by using the DataTable plugin of the  
168 JQuery framework which allows to create tables that can be easily filtered and sorted.  
169 Genes are linked to their NCBI gene homepage using their unique gene ID. Results  
170 can be copied, printed or exported in tabulated-separated or pdf formats. An online  
171 documentation section is also provided to help users in their searches. MiRabel  
172 website can be found at <http://bioinfo.univ-rouen.fr/mirabel/>.

### 173 **Evaluating aggregation methods**

174 The performances of the aggregation methods (Mean, Default (i.e.  
175 RobustRankAggreg, RRA), Geometric mean, Median, Min, Stuart) provided by the R  
176 package RRA have been compared to each other (except for the Stuart method due  
177 to extensive computation time). ROC and PR analysis show that the mean of the ranks  
178 provides the best result ( $ROC\_AUC_{Mean} = 0.5790$ ,  $PR\_AUC_{Mean} = 0.0436$ ) (Fig. 3A-D).  
179 Interestingly, the F-score for different percentage of the top interactions indicates that  
180 the mean method is also the most consistent in promoting validated interactions (Fig.  
181 3E-F). These results were confirmed using 10 smaller datasets. There again, the mean  
182 of the ranks provides the best results ( $ROC\_AUC_{Mean} = 0.6888 \pm 0.0030$ ,  $PR\_AUC =$   
183  $0.0290 \pm 0.0006$ ) with significant statistical differences compared to other proposed  
184 methods (Table S2). When looking at top predictions only, the mean method remains  
185 significantly better than other compared methods (Table S1). Moreover these analyses  
186 show that among the ten datasets, the mean aggregation method provides the best  
187  $ROC\_AUC$  nine times whereas geometric mean method succeeds only one time (data  
188 not shown). These results led us to use the mean method to aggregate the ranks of  
189 miRanda, PITA and SVMicrO.



## 190 **Comparison to aggregated methods**

191 In order to test whether any improvement was gained with our aggregation method,  
192 the performances of each aggregated algorithms were compared to miRabel using  
193 ROC and PR analysis as well. These comparisons were done with 982,411 predicted  
194 interactions that are common to miRanda, PITA and SVMicrO. Within these  
195 predictions, 30,698 are experimentally validated ones. ROC curve analysis shows that  
196 miRabel improves the prediction of validated miRNA::mRNA interactions (ROC\_AUC  
197 = 0.5984) compared to miRanda, PITA and SVMicrO (Fig. 4A-B). This improvement is  
198 even more visuable with the PR analysis (PR\_AUC = 0.0437) (Fig. 4C-D) and the  
199 consistency of miRabel superior F-score throughout the dataset (Fig. 4E-F). Using 10  
200 smaller datasets allowed us to confirm and to enhance the significativity of these  
201 analyses ( $p$ -value  $<10^{-4}$ ) (Table S3). A significant improvement was also manifest for  
202 the aggregated predictions for the top ranked interactions (ROC\_pAUC<sub>90%</sub> = 0.0088;  
203 Sen<sub>90%</sub> = 0.1670) compared to miRanda, PITA and SVMicrO (Table S3).

## 204 **Comparison to other prediction tools**

205 The performances of miRabel were also compared to MBSTAR [37], miRWalk (v.2.0)  
206 [24], and TargetScan (v.7.1) [38], three efficient, up-to-date and/or widely used  
207 prediction web tools [21]. ROC and PR curves analysis using the same methods (all  
208 common interactions and ten random sets of 50,000 interactions) shows that our  
209 prediction data significantly improves the overall prediction of miRNAs target mRNAs  
210 when compared to MBSTAR (Fig. 5 and Table S4) and miRWalk (Fig. 6 and Table S5).  
211 However, even though miRabel shows better overall performance than Targetscan  
212 (ROC\_AUC: 0.5577 vs 0.5477,  $p=3.5\times 10^{-3}$ , Fig. 7-B, Table S6), they both seem fairly  
213 equal when we focus the analysis on true positives identification (PR\_AUC: 0.0404 vs

214 0.0406, Fig. 6C-F). Optimal specificity, ROC\_pAUC<sub>90%</sub> and the corresponding  
215 sensitivity of our aggregated data exhibit also better performances than those of  
216 MBSTAR (Table S4) and miRWalk (Table S5) whereas these parameters are almost  
217 similar to the ones calculated for Targetscan (Table S6).

## 218 **Discussion**

219 The prediction of miRNA targets is a bioinformatic challenge. Indeed, increased  
220 biological knowledge of the interactions between miRNAs and their targets has  
221 improved the predictions but they still suffer from high false positive rate [28]. Actually,  
222 each algorithm incorporates its own characteristics [39] and the comparison of their  
223 results highlights important contradictions in their respective predictions [39, 40]. We  
224 therefore hypothesized that the aggregation of the predictions of several algorithms  
225 would improve the relevance and the robustness of the prediction of miRNA targets.

226 In order to validate this concept, we have chosen to aggregate the predictions of three  
227 algorithms, miRanda, PITA and SVMicrO, because they use different but  
228 complementary information such as site accessibility or free energy to make their  
229 predictions. The results they provide are different both in terms of their probability of  
230 interaction (i.e., their ranking) and their number of target mRNAs [39]. Thus, only 11.4%  
231 of total interactions (982,411 / 8.6 million) are common to each other. The example of  
232 hsa-miR-16 that we present (Fig. 2B) also illustrates very well these divergences of  
233 predictions. Moreover, because these algorithms have not been updated recently,  
234 some more refined features of the seed region found in recent prediction approaches  
235 such as TarPmiR [41], are not considered in our aggregated results. This also explains  
236 why only 1,107 miRNAs have target mRNAs among the 2,578 that miRabel includes.  
237 Only the human miRNAs were used initially to limit the amount of data to be

238 manipulated as well as the associated computation times, but the approach that we  
239 propose is generalizable to the miRNAs of all origins. Since the score generated by  
240 the RRA package is also representative of the significance of the ranking for a given  
241 interaction, we suggest to use miRabel with a threshold of 0.05. Moreover, this is in  
242 agreement with the threshold estimated on the different ROC analyses using the  
243 closest top-left method (data not shown). We, however, acknowledge that further  
244 analyses are required to really define an optimal threshold for miRabel. Finally, the  
245 choice of algorithms is also limited by the free availability of their prediction database.  
246 To further improve predictions, it would therefore be interesting to take into account  
247 newer promising tools such as ComiR [42] or miRmap [43] whose prediction algorithms  
248 have been shown to perform well [39].

249 Comparing five of the aggregation methods included in the RRA package shows that  
250 the "mean" method is best for aggregating miRNA prediction lists (Fig. 3, Table S2).  
251 However, although statistically significant, these values are relatively close to one  
252 another. These results are similar to those obtained in studies designed to compare  
253 the performance of several rank aggregation methods and showing better  
254 performances for the mean method [44-46]. Although not the best in our study, the  
255 RRA method can handle incomplete rankings and is robust to noise due to divergent  
256 lists [33]. In addition, it has already been used to aggregate miRNA profiles in a meta-  
257 analysis in nasopharyngeal cancer but without comparing it with other aggregation  
258 methods [47]. Among other aggregation methods, Cross Entropy Monte-Carlo has  
259 been found to be inadequate for our study due to too extensive computation times with  
260 large lists of items as previously reported [48]. As an example, a preliminary test  
261 showed us that it takes around 15 hours on a desktop computer for the ECMC method  
262 as integrated in the RankAggreg R package [49] to aggregate three short lists of only

263 one hundred predicted mRNA targets from one microRNA (data not shown). Another  
264 method that could be evaluated with our data is the Borda count algorithm [50] which  
265 has already been used to aggregate cancer expression microarrays and proteomics  
266 datasets into a single optimal list [51].

267 Our miRNA target predictions database, called miRabel, performs better than each of  
268 the individual aggregated algorithms (Fig. 4). Interestingly, prediction improvement is  
269 clearly visible in the top ranked interactions of miRabel (Table S3), thus showing that  
270 aggregating results from other tools moved validated interactions up in ranking and  
271 moved down less relevant ones. This is in line with multiple studies which show that  
272 combining data is so far the best compromise to obtain the most relevant interactions  
273 [16, 22, 40, 52, 53]. A recent study in particular shows that the union (but not the  
274 intersection) of the predictions of three tools among four (TargetScan, miRanda-  
275 mirSVR, RNA22) increases the performance of the analyses [54]. However, our work  
276 goes further since prediction lists were aggregated and re-ranked in a unique list. The  
277 performance of their method was evaluated using only ten miRNAs and 1,400 genes  
278 but not the entire database. In order to avoid selection bias of the datasets, we  
279 analyzed all 982,411 interactions common to miRabel and the three aggregated  
280 algorithms, which represent 519 miRNAs and 14,319 genes. The use of ten random  
281 datasets of 50,000 interactions also enhances the relevance and statistical analysis of  
282 the results. Furthermore, even though miRabel aggregates older databases, it shows  
283 equal (vs. TargetScan) or better (vs. MBSTAR and miRWalk) performances than up-  
284 to-date algorithms, thus clearly establishing that our method, even though simple, has  
285 a great potential. Interestingly, from all evaluations done with our datasets and  
286 methodology, we found that other algorithm performances to be quite different from  
287 what was originally described in their respective original publications. This is in

288 agreement with a previous study which highlighted the importance of testing prediction  
289 results on multiple, independent datasets and with a standardized evaluation protocol  
290 [39]. This is also one of the strengths of our study. Indeed, throughout all comparisons,  
291 miRabel was tested on 55 different datasets, which gives more robustness to the  
292 performance values calculated for our method.

## 293 **Conclusions**

294 MiRabel is a new efficient tool for the prediction of miRNA target mRNAs and their  
295 associated biological functions. Using an aggregation method, we improved the  
296 relevance of the predictions of 3 available algorithms. This promising approach can  
297 easily be extended to all publicly available databases or to other species. Moreover,  
298 the integrated biological pathways provide a more comprehensive view and new  
299 insights into the complex regulatory network of miRNAs.

## 300 **Acknowledgements**

301 We thank Dr. Isabelle Lihrmann for critical reading of the manuscript and fruitful  
302 discussion. We are grateful to the CRIANN (Centre Régional Informatique et  
303 d'Applications Numériques de Normandie) for allowing us to use their computing facility  
304 and University of Rouen Normandy to host the miRabel's website.

305

## 306 **References**

- 307 1. Friedman RC, Farh KK, Burge CB, Bartel DP. Most mammalian mRNAs are  
308 conserved targets of microRNAs. *Genome research*. 2009;19(1):92-105.
- 309 2. Lee RC, Feinbaum RL, Ambros V. The *C. elegans* heterochronic gene *lin-4*  
310 encodes small RNAs with antisense complementarity to *lin-14*. *Cell*. 1993;75(5):843-  
311 54.
- 312 3. Krol J, Loedige I, Filipowicz W. The widespread regulation of microRNA  
313 biogenesis, function and decay. *Nature reviews Genetics*. 2010;11(9):597-610.
- 314 4. Garzon R, Calin GA, Croce CM. MicroRNAs in Cancer. *Annual review of*  
315 *medicine*. 2009;60:167-79.
- 316 5. Selbach M, Schwanhausser B, Thierfelder N, Fang Z, Khanin R, Rajewsky N.  
317 Widespread changes in protein synthesis induced by microRNAs. *Nature*.  
318 2008;455(7209):58-63.
- 319 6. Pasquinelli AE. MicroRNAs and their targets: recognition, regulation and an  
320 emerging reciprocal relationship. *Nature reviews Genetics*. 2012;13(4):271-82.
- 321 7. Guo H, Ingolia NT, Weissman JS, Bartel DP. Mammalian microRNAs  
322 predominantly act to decrease target mRNA levels. *Nature*. 2010;466(7308):835-40.
- 323 8. Lytle JR, Yario TA, Steitz JA. Target mRNAs are repressed as efficiently by  
324 microRNA-binding sites in the 5' UTR as in the 3' UTR. *Proceedings of the National*  
325 *Academy of Sciences of the United States of America*. 2007;104(23):9667-72.
- 326 9. Shin C, Nam JW, Farh KK, Chiang HR, Shkumatava A, Bartel DP. Expanding  
327 the microRNA targeting code: functional sites with centered pairing. *Molecular cell*.  
328 2010;38(6):789-802.

- 329 10. Peterson SM, Thompson JA, Ufkin ML, Sathyanarayana P, Liaw L, Congdon  
330 CB. Common features of microRNA target prediction tools. *Frontiers in genetics*.  
331 2014;5:23.
- 332 11. Yue D, Liu H, Huang Y. Survey of Computational Algorithms for MicroRNA  
333 Target Prediction. *Current genomics*. 2009;10(7):478-92.
- 334 12. Brennecke J, Stark A, Russell RB, Cohen SM. Principles of microRNA-target  
335 recognition. *PLoS biology*. 2005;3(3):e85.
- 336 13. Long D, Lee R, Williams P, Chan CY, Ambros V, Ding Y. Potent effect of target  
337 structure on microRNA function. *Nature structural & molecular biology*.  
338 2007;14(4):287-94.
- 339 14. Henry VJ, Bandrowski AE, Pepin AS, Gonzalez BJ, Desfeux A. OMICtools: an  
340 informative directory for multi-omic data analysis. *Database : the journal of biological*  
341 *databases and curation*. 2014;2014.
- 342 15. Le TD, Zhang J, Liu L, Li J. Ensemble Methods for MiRNA Target Prediction  
343 from Expression Data. *PloS one*. 2015;10(6):e0131627.
- 344 16. Marbach D, Costello JC, Kuffner R, Vega NM, Prill RJ, Camacho DM, et al.  
345 Wisdom of crowds for robust gene network inference. *Nature methods*. 2012;9(8):796-  
346 804.
- 347 17. Witkos TM, Koscianska E, Krzyzosiak WJ. Practical Aspects of microRNA  
348 Target Prediction. *Current molecular medicine*. 2011;11(2):93-109.
- 349 18. Pinzon N, Li B, Martinez L, Sergeeva A, Presumey J, Apparailly F, et al.  
350 microRNA target prediction programs predict many false positives. *Genome research*.  
351 2017;27(2):234-45.

- 352 19. Thomas M, Lieberman J, Lal A. Desperately seeking microRNA targets. *Nature*  
353 *structural & molecular biology*. 2010;17(10):1169-74.
- 354 20. Min H, Yoon S. Got target? Computational methods for microRNA target  
355 prediction and their extension. *Experimental & molecular medicine*. 2010;42(4):233-  
356 44.
- 357 21. Fan X, Kurgan L. Comprehensive overview and assessment of computational  
358 prediction of microRNA targets in animals. *Briefings in bioinformatics*. 2014.
- 359 22. Sedaghat N, Fathy M, Modarressi MH, Shojaie A. Combination of Supervised  
360 and Unsupervised Approaches for miRNA Target Prediction. *IEEE/ACM transactions*  
361 *on computational biology and bioinformatics*. 2017.
- 362 23. Dweep H, Gretz N. miRWalk2.0: a comprehensive atlas of microRNA-target  
363 interactions. *Nature methods*. 2015;12(8):697.
- 364 24. Dweep H, Sticht C, Pandey P, Gretz N. miRWalk--database: prediction of  
365 possible miRNA binding sites by "walking" the genes of three genomes. *Journal of*  
366 *biomedical informatics*. 2011;44(5):839-47.
- 367 25. Lu TP, Lee CY, Tsai MH, Chiu YC, Hsiao CK, Lai LC, et al. miRSystem: an  
368 integrated system for characterizing enriched functions and pathways of microRNA  
369 targets. *PloS one*. 2012;7(8):e42390.
- 370 26. Nam S, Kim B, Shin S, Lee S. miRGator: an integrated system for functional  
371 annotation of microRNAs. *Nucleic acids research*. 2008;36(Database issue):D159-64.
- 372 27. Lukasik A, Wojcikowski M, Zielenkiewicz P. Tools4miRs - one place to gather  
373 all the tools for miRNA analysis. *Bioinformatics*. 2016;32(17):2722-4.



- 374 28. Ritchie W, Flamant S, Rasko JE. Predicting microRNA targets and functions:  
375 traps for the unwary. *Nature methods*. 2009;6(6):397-8.
- 376 29. Sethupathy P, Megraw M, Hatzigeorgiou AG. A guide through present  
377 computational approaches for the identification of mammalian microRNA targets.  
378 *Nature methods*. 2006;3(11):881-6.
- 379 30. Betel D, Koppal A, Agius P, Sander C, Leslie C. Comprehensive modeling of  
380 microRNA targets predicts functional non-conserved and non-canonical sites. *Genome*  
381 *Biol*. 2010;11(8):R90.
- 382 31. Kertesz M, Iovino N, Unnerstall U, Gaul U, Segal E. The role of site accessibility  
383 in microRNA target recognition. *Nature genetics*. 2007;39(10):1278-84.
- 384 32. Liu H, Yue D, Chen Y, Gao SJ, Huang Y. Improving performance of mammalian  
385 microRNA target prediction. *BMC bioinformatics*. 2010;11:476-91.
- 386 33. Kolde R, Laur S, Adler P, Vilo J. Robust rank aggregation for gene list integration  
387 and meta-analysis. *Bioinformatics*. 2012;28(4):573-80.
- 388 34. Robin X, Turck N, Hainard A, Tiberti N, Lisacek F, Sanchez JC, et al. pROC: an  
389 open-source package for R and S+ to analyze and compare ROC curves. *BMC*  
390 *bioinformatics*. 2011;12:77.
- 391 35. Hsu SD, Lin FM, Wu WY, Liang C, Huang WC, Chan WL, et al. miRTarBase: a  
392 database curates experimentally validated microRNA-target interactions. *Nucleic acids*  
393 *research*. 2011;39(Database issue):D163-9.
- 394 36. Xiao F, Zuo Z, Cai G, Kang S, Gao X, Li T. miRecords: an integrated resource  
395 for microRNA-target interactions. *Nucleic acids research*. 2009;37(Database  
396 issue):D105-10.

- 397 37. Bandyopadhyay S, Ghosh D, Mitra R, Zhao Z. MBSTAR: multiple instance  
398 learning for predicting specific functional binding sites in microRNA targets. *Scientific*  
399 *reports*. 2015;5:8004.
- 400 38. Agarwal V, Bell GW, Nam JW, Bartel DP. Predicting effective microRNA target  
401 sites in mammalian mRNAs. *eLife*. 2015;4.
- 402 39. Fan X, Kurgan L. Comprehensive overview and assessment of computational  
403 prediction of microRNA targets in animals. *Briefings in bioinformatics*. 2015;16(5):780-  
404 94.
- 405 40. Shirdel EA, Xie W, Mak TW, Jurisica I. NAViGaTing the micronome--using  
406 multiple microRNA prediction databases to identify signalling pathway-associated  
407 microRNAs. *PloS one*. 2011;6(2):e17429.
- 408 41. Ding J, Li X, Hu H. TarPmiR: a new approach for microRNA target site  
409 prediction. *Bioinformatics*. 2016.
- 410 42. Coronello C, Benos PV. ComiR: Combinatorial microRNA target prediction  
411 tool. *Nucleic acids research*. 2013;41(Web Server issue):W159-64.
- 412 43. Vejnar CE, Zdobnov EM. MiRmap: comprehensive prediction of microRNA  
413 target repression strength. *Nucleic acids research*. 2012;40(22):11673-83.
- 414 44. Burkovski A, Lausser L, Kraus J, Kestler H, editors. Rank Aggregation for  
415 Candidate Gene Identification. 36th Annual Conference (GfKI 2012) of the German  
416 Classification Society; 2012; Hildesheim: Springer International Publishing.
- 417 45. Wald R, Khoshgoftaar T, Dittman D. Mean Aggregation Versus Robust Rank  
418 Aggregation For Ensemble Gene Selection. In: IEEE, editor. 11th International  
419 Conference on Machine Learning and Applications; Boca Raton, Florida, USA2012. p.  
420 63-9.

- 421 46. Dittman D, Khoshgoftaar T, Wald R, Napolitano A, editors. Classification  
422 Performance of Rank Aggregation Techniques for Ensemble Gene Selection.  
423 Proceedings of the Twenty-Sixth International Florida Artificial Intelligence Research  
424 Society Conference; 2013; St. Pete Beach, Florida, USA: Association for the  
425 Advancement of Artificial Intelligence.
- 426 47. Luan J, Wang J, Su Q, Chen X, Jiang G, Xu X. Meta-analysis of the differentially  
427 expressed microRNA profiles in nasopharyngeal carcinoma. *Oncotarget*.  
428 2016;7(9):10513-21.
- 429 48. Lin S. Rank aggregation methods. *Wiley Interdisciplinary Reviews:*  
430 *Computational Statistics*. 2010;2(5):555-70.
- 431 49. Pihur V, Datta S, Datta S. RankAggreg, an R package for weighted rank  
432 aggregation. *BMC bioinformatics*. 2009;10:62.
- 433 50. Dwork C, Kumar R, Naor M, Sivakumar D. Rank Aggregation Revisited.  
434 *Systems Research*. 2001;13(2):86-93.
- 435 51. Jurman G, Merler S, Barla A, Paoli S, Galea A, Furlanello C. Algebraic stability  
436 indicators for ranked lists in molecular profiling. *Bioinformatics*. 2008;24(2):258-64.
- 437 52. Andres-Leon E, Gonzalez Pena D, Gomez-Lopez G, Pisano DG. miRGate: a  
438 curated database of human, mouse and rat miRNA-mRNA targets. *Database : the*  
439 *journal of biological databases and curation*. 2015;2015:bav035.
- 440 53. Friedman Y, Karsenty S, Linial M. miRror-Suite: decoding coordinated  
441 regulation by microRNAs. *Database : the journal of biological databases and curation*.  
442 2014;2014.

443 54. Oliveira AC, Bovolenta LA, Nachtigall PG, Herkenhoff ME, Lemke N, Pinhal D.  
444 Combining Results from Distinct MicroRNA Target Prediction Tools Enhances the  
445 Performance of Analyses. *Frontiers in genetics*. 2017;8:59.

446

## 447 **Figures legends**

### 448 **Figure 1: Testing datasets design and databases performance analysis** 449 **methodology**

450 A large dataset containing all common interactions between compared databases is  
451 created **(A)**, For ease of use, 10 smaller datasets of 50,000 interactions were randomly  
452 picked from all common ones **(B)**. Predictions performance are then compared using  
453 ROC and PR analysis on all datasets.

454

### 455 **Figure 2: Overview of miRabel**

456 Predictions results from miRanda, PITA and SVMicrO for 3'UTR are aggregated using  
457 Robust Rank Aggreg. 5'UTR and CDS predictions are retrieved from miRWalk  
458 database. Experimentally validated interactions are identified using miRTarBase and  
459 miRecords. Links between predictions and pathways are established based on KEGG  
460 information **(A)**. An example of miRabel web interface is shown using predictions for  
461 hsa-miR-16. Predicted targets are ranked according to miRabel's score. Rank found  
462 for this interaction in each database are indicated as well as its experimental validation  
463 status and mRNA sub-localization **(B)**.

464

### 465 **Figure 3: Performances comparison of aggregation methods**

466 ROC curve analysis **(A)**, showing the sensitivity and the specificity for 5 aggregation  
467 methods from the RRA R package, and their respective AUC **(B)** have been calculated  
468 using the pROC R package on 1 million random interactions. Using the same dataset,  
469 a precision and recall (PR) analysis **(C)** with PR\_AUC **(D)** has been carried out using

470 R programming as well. The cumulative harmonic mean between precision and recall  
471 (F-score) was also plotted (**E**) for each ranked interaction of this dataset. The average  
472 F-score is reported for the top 10%, 20%, 40% and all interactions (**F**). The higher are  
473 the ROC\_AUC, PR\_AUC and F-score, the better are the performances of the tested  
474 method. Highest values are in bold font.

475

#### 476 **Figure 4: Performances comparison of aggregated prediction algorithms**

477 ROC curve analysis (**A**), showing the sensitivity and the specificity for miRabel,  
478 miRanda, PITA and SVMicro, and their respective AUC (**B**) have been calculated  
479 using the pROC R package on 982,411 common interactions. Using the same dataset,  
480 a precision and recall (PR) analysis (**C**) with PR\_AUC (**D**) has been carried out using  
481 R programming as well. The cumulative harmonic mean between precision and recall  
482 (F-score) was also plotted (**E**) for each ranked interaction of this dataset. The average  
483 F-score is reported for the top 10%, 20%, 40% and all interactions (**F**). The higher are  
484 the ROC\_AUC, PR\_AUC and F-score, the better are the performances of the tested  
485 algorithm. Highest values are in bold font.

486

#### 487 **Figure 5: Performances comparison of miRabel and MBSTAR**

488 ROC curve analysis (**A**), showing the sensitivity and the specificity for miRabel and  
489 MBSTAR, and their respective AUC (**B**) have been calculated using the pROC R  
490 package on 583,547 common interactions. Using the same dataset, a precision and  
491 recall (PR) analysis (**C**) with PR\_AUC (**D**) has been carried out using R programming  
492 as well. The cumulative harmonic mean between precision and recall (F-score) was  
493 also plotted (**E**) for each ranked interaction of this dataset. The average F-score is

494 reported the top 10%, 20%, 40% and all interactions (**F**). The higher are the ROC\_AUC,  
495 PR\_AUC and F-score, the better are the performances of the tested algorithm. Highest  
496 values are in bold font.

497

#### 498 **Figure 6: Performances comparison of miRabel and miRWalk**

499 ROC curve analysis (**A**), showing the sensitivity and the specificity for miRabel and  
500 miRWalk, and their respective AUC (**B**) have been calculated using the pROC R  
501 package on 126,214 common interactions. Using the same dataset, a precision and  
502 recall (PR) analysis (**C**) with PR\_AUC (**D**) has been carried out using R programming  
503 as well. The cumulative harmonic mean between precision and recall (F-score) was  
504 also plotted (**E**) for each ranked interaction of this dataset. The average F-score is  
505 reported the top 10%, 20%, 40% and all interactions (**F**). The higher are the ROC\_AUC,  
506 PR\_AUC and F-score, the better are the performances of the tested algorithm. Highest  
507 values are in bold font.

508

#### 509 **Figure 7 : Performances comparison of miRabel and TargetScan**

510 ROC curve analysis (**A**), showing the sensitivity and the specificity for miRabel and  
511 TargetScan, and their respective AUC (**B**) have been calculated using the pROC R  
512 package on 126,214 common interactions. Using the same dataset, a precision and  
513 recall (PR) analysis (**C**) with PR\_AUC (**D**) has been carried out using R programming  
514 as well. The cumulative harmonic mean between precision and recall (F-score) was  
515 also plotted (**E**) for each ranked interaction of this dataset. The average F-score is  
516 reported the top 10%, 20%, 40% and all interactions (**F**). The higher are the ROC\_AUC,

517 PR\_AUC and F-score, the better are the performances of the tested algorithm. Highest

518 values are in bold font.

519



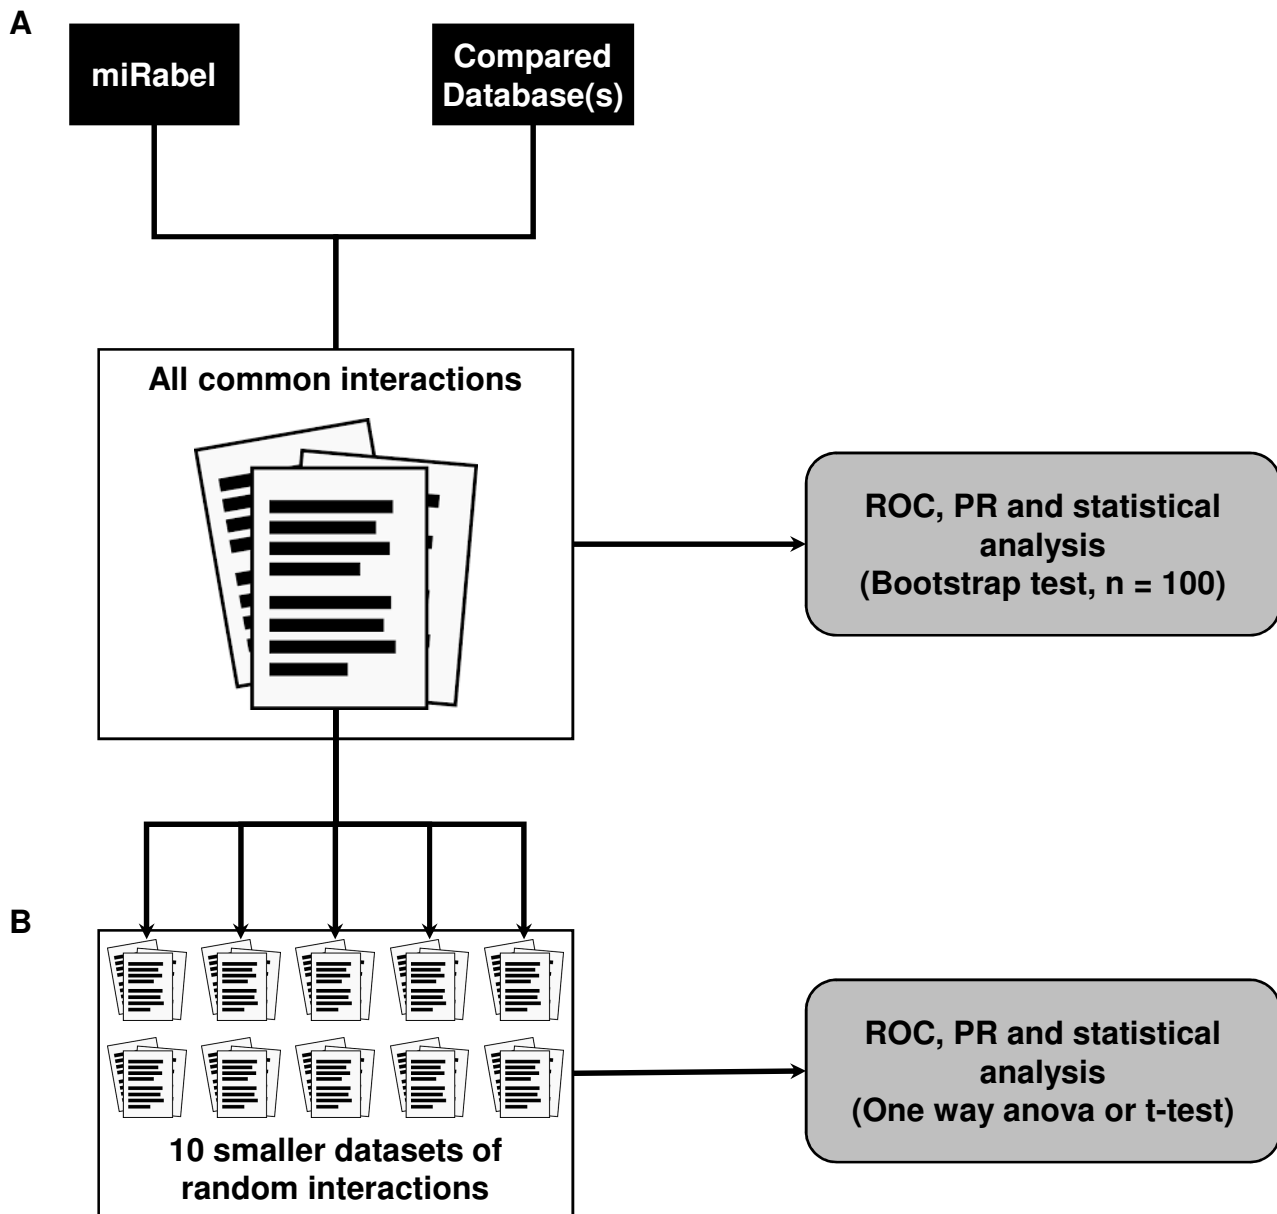

Figure 1

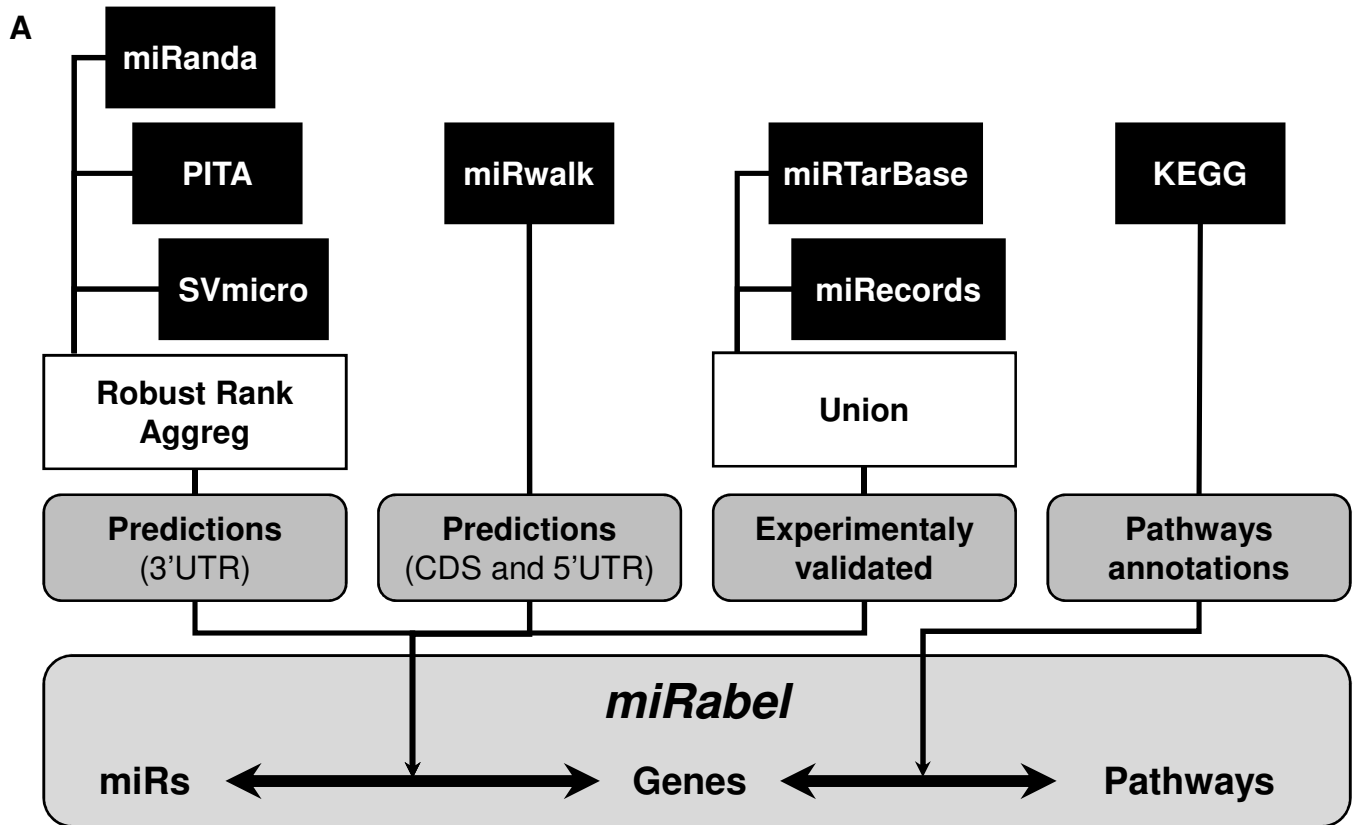

**B**

A simple and efficient miRNA target prediction tool

GET STARTED TOOLS HELP ABOUT...

Input:

Copy TSV PDF Print

Show 10 entries Search:

| gene                     | miRabel score      | PITA | miRanda | SVMicro | VALID | 5'UTR | CDS |
|--------------------------|--------------------|------|---------|---------|-------|-------|-----|
| <a href="#">USP15</a>    | 0.0017707141814753 | 36   | 43      | 374     | YES   | NO    | NO  |
| <a href="#">YWHAQ</a>    | 0.0018443843582645 | 50   | 329     | 143     | YES   | NO    | NO  |
| <a href="#">LRRCL7</a>   | 0.0019253494683653 | 449  | 51      | 95      | NO    | NO    | NO  |
| <a href="#">ARPP21</a>   | 0.0019423809135333 | 459  | 89      | 62      | NO    | NO    | NO  |
| <a href="#">FAM70A</a>   | 0.0019435210851952 | 176  | 179     | 256     | YES   | NO    | NO  |
| <a href="#">AP1S2</a>    | 0.0019629991147667 | 195  | 29      | 404     | NO    | NO    | NO  |
| <a href="#">CCNE1</a>    | 0.0019884689245373 | 255  | 104     | 291     | YES   | NO    | YES |
| <a href="#">GPATCH8</a>  | 0.0020594648085535 | 24   | 119     | 567     | YES   | NO    | NO  |
| <a href="#">E2F7</a>     | 0.0020618704147637 | 211  | 443     | 58      | YES   | NO    | NO  |
| <a href="#">IVNS1ABP</a> | 0.0021589577663690 | 96   | 495     | 200     | YES   | NO    | NO  |

Showing 1 to 10 of 10,729 entries (filtered from 8,613,725 total entries) Previous Next

Search impacted pathways.

Maximum score:

Predict!

Figure 2

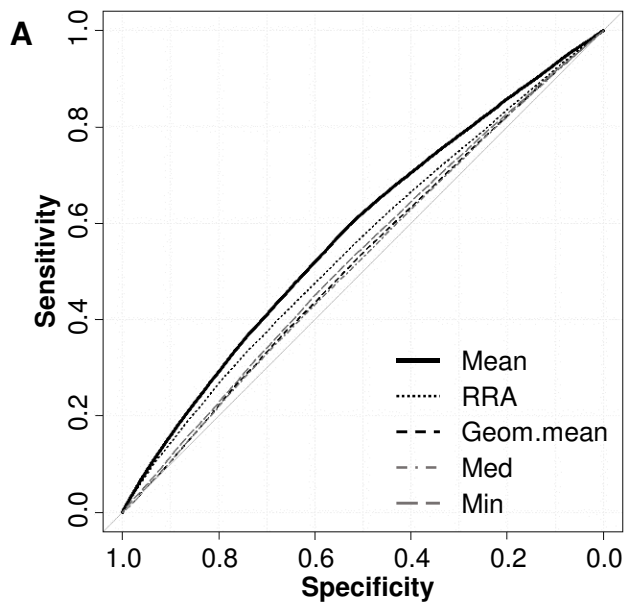

**B**

| miRabel   | ROC_AUC       |
|-----------|---------------|
| Mean      | <b>0.5790</b> |
| RRA       | 0.5515        |
| Geom.mean | 0.5234        |
| Median    | 0.5204        |
| Min       | 0.5312        |

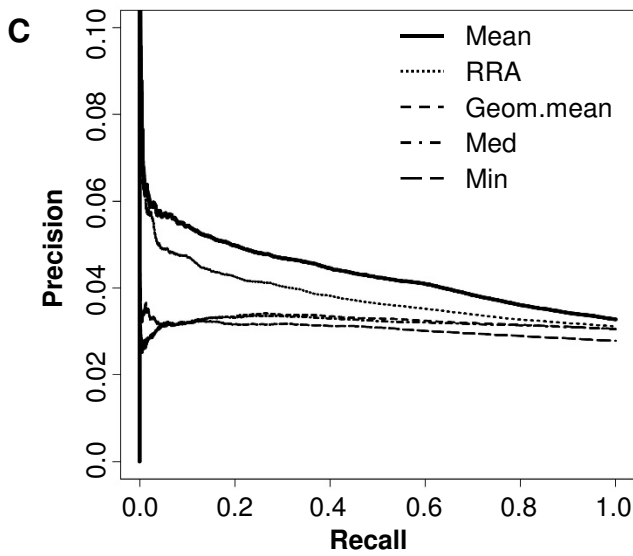

**D**

| miRabel   | PR_AUC        |
|-----------|---------------|
| Mean      | <b>0.0436</b> |
| RRA       | 0.0383        |
| Geom.mean | 0.0323        |
| Median    | 0.0320        |
| Min       | 0.0305        |

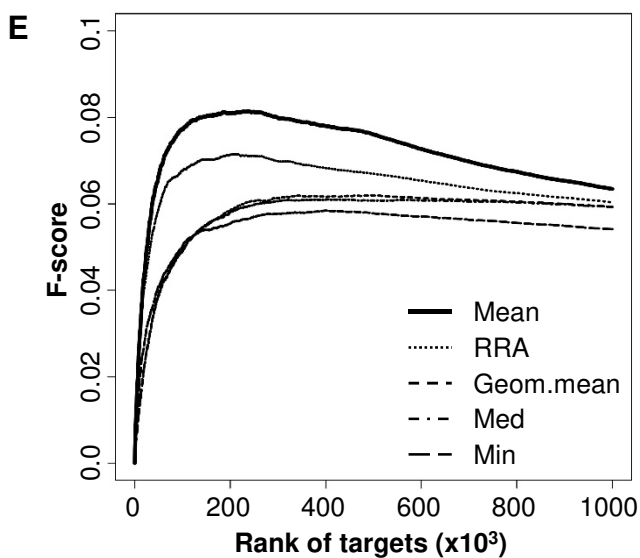

**F**

| Top % of predictions | Mean F-score  |        |            |        |        |
|----------------------|---------------|--------|------------|--------|--------|
|                      | Mean          | RRA    | Geom. mean | Median | Min    |
| 10%                  | <b>0.0591</b> | 0.0528 | 0.0344     | 0.0344 | 0.0369 |
| 20%                  | <b>0.0696</b> | 0.0614 | 0.0446     | 0.0445 | 0.0453 |
| 40%                  | <b>0.0748</b> | 0.0657 | 0.0528     | 0.0524 | 0.0514 |
| 100%                 | <b>0.0721</b> | 0.0647 | 0.0576     | 0.0572 | 0.0543 |

Figure 3

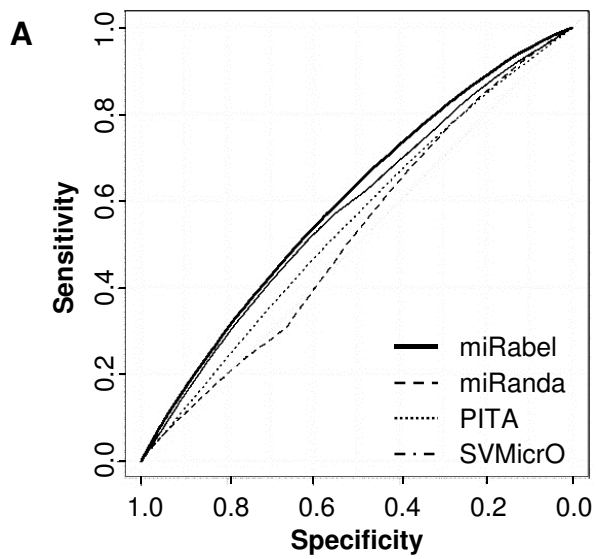

**B**

|         | ROC_AUC       |
|---------|---------------|
| miRabel | <b>0.5984</b> |
| miRanda | 0.5218        |
| PITA    | 0.5464        |
| SVMicO  | 0.5787        |

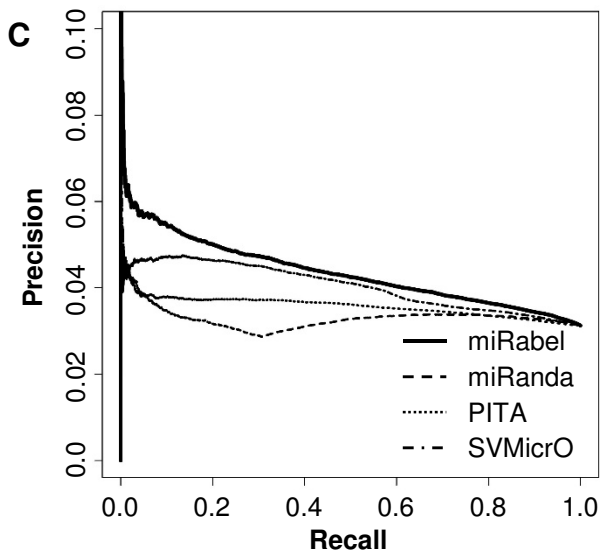

**D**

|         | PR_AUC        |
|---------|---------------|
| miRabel | <b>0.0437</b> |
| miRanda | 0.0330        |
| PITA    | 0.0361        |
| SVMicO  | 0.0404        |

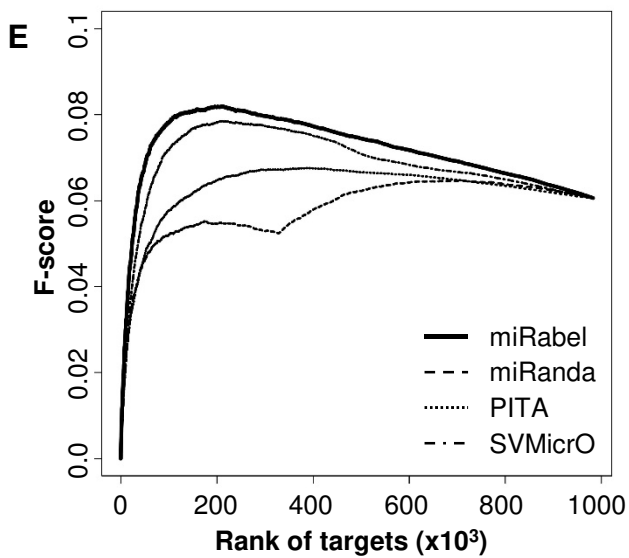

**F**

|                      | Mean F-score  |         |        |        |
|----------------------|---------------|---------|--------|--------|
| Top % of predictions | miRabel       | miRanda | PITA   | SVMicO |
| 10%                  | <b>0.0603</b> | 0.0410  | 0.0425 | 0.0515 |
| 20%                  | <b>0.0704</b> | 0.0475  | 0.0520 | 0.0637 |
| 40%                  | <b>0.0751</b> | 0.0509  | 0.0593 | 0.0705 |
| 100%                 | <b>0.0716</b> | 0.0581  | 0.0625 | 0.0685 |

Figure 4

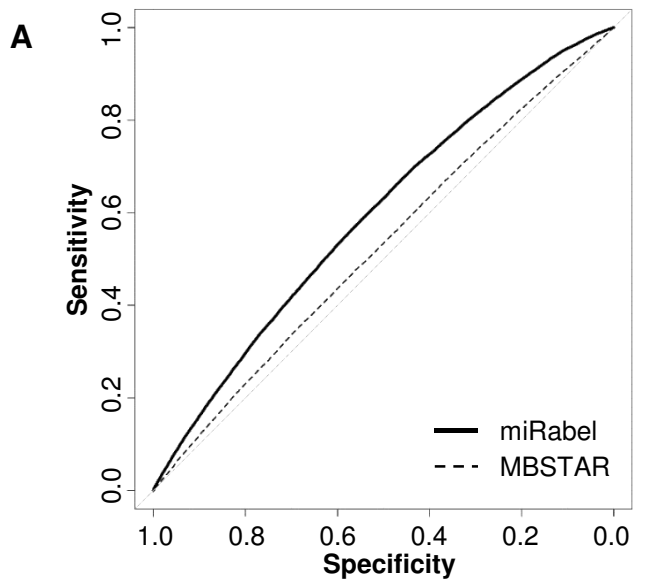

**B**

|         | ROC_AUC |
|---------|---------|
| miRabel | 0.5932  |
| MBSTAR  | 0.5261  |

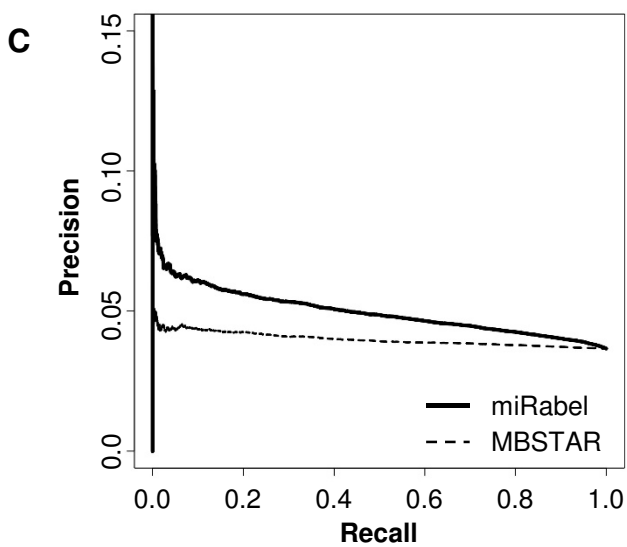

**D**

|         | PR_AUC |
|---------|--------|
| miRabel | 0.0498 |
| MBSTAR  | 0.0401 |

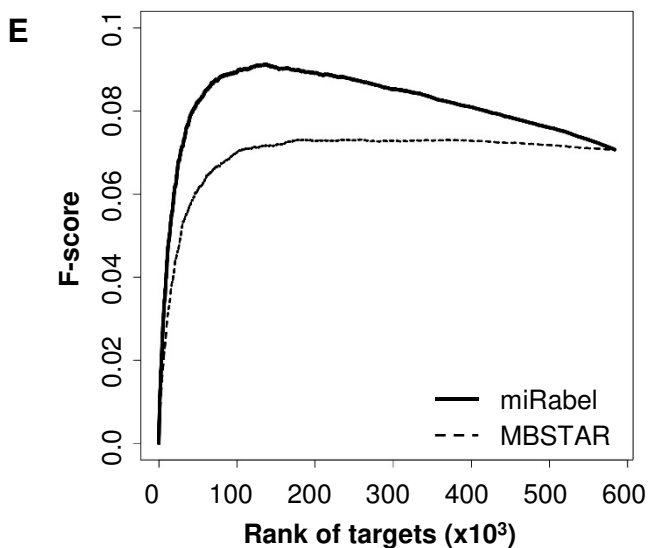

**F**

|                      | Mean F-score |        |
|----------------------|--------------|--------|
| Top % of predictions | miRabel      | MBSTAR |
| 10%                  | 0.0633       | 0.0454 |
| 20%                  | 0.0758       | 0.0568 |
| 40%                  | 0.0828       | 0.0645 |
| 100%                 | 0.0812       | 0.0691 |

Figure 5

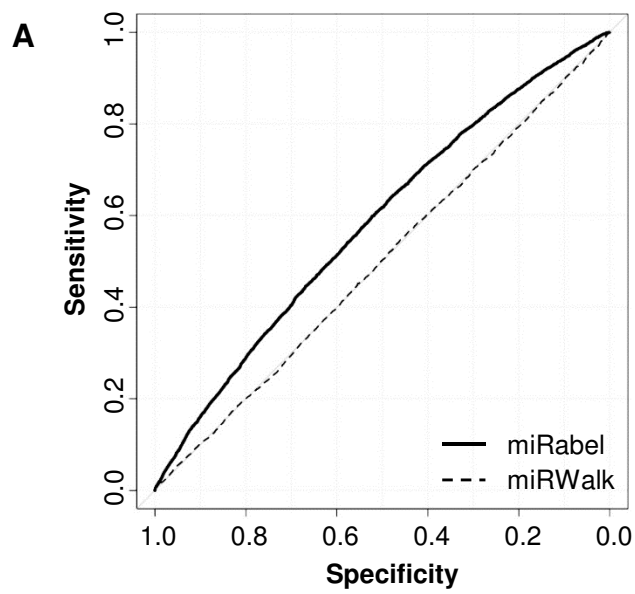

**B**

|         | ROC_AUC |
|---------|---------|
| miRabel | 0.5836  |
| miRWalk | 0.4988  |

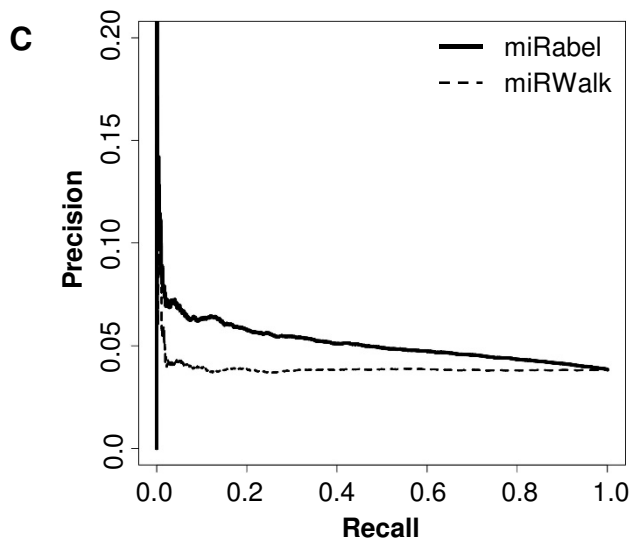

**D**

|         | PR_AUC |
|---------|--------|
| miRabel | 0.0515 |
| miRWalk | 0.0394 |

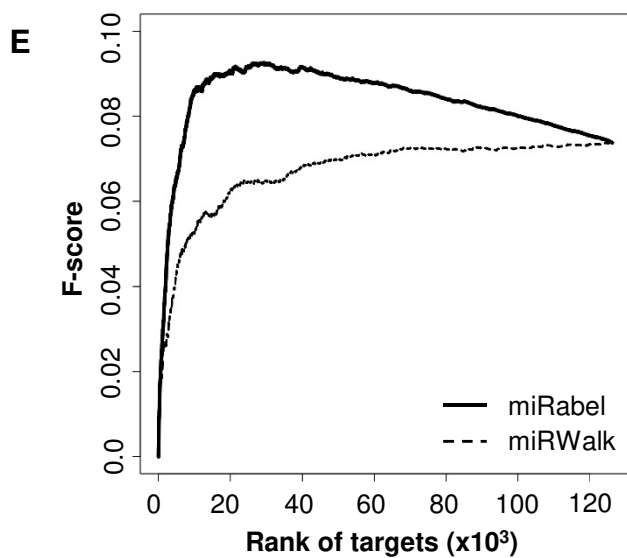

**F**

|                      | Mean F-score |         |
|----------------------|--------------|---------|
| Top % of predictions | miRabel      | miRWalk |
| 10%                  | 0.0656       | 0.0422  |
| 20%                  | 0.0778       | 0.0515  |
| 40%                  | 0.0844       | 0.0592  |
| 100%                 | 0.0831       | 0.0671  |

Figure 6

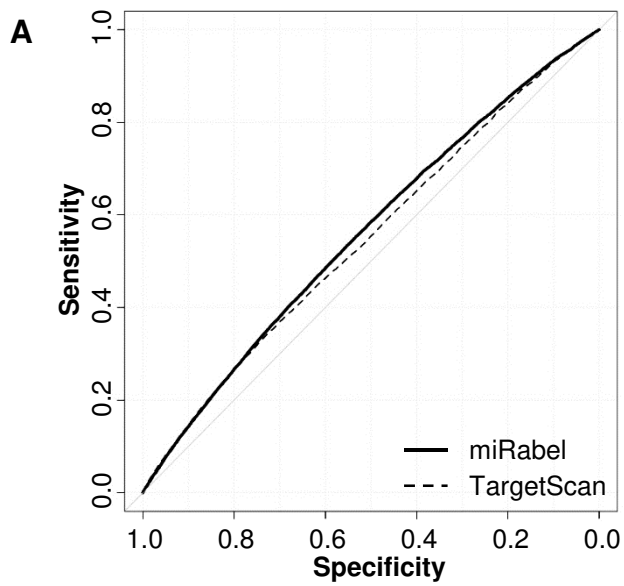

**B**

| ROC_AUC    |               |
|------------|---------------|
| miRabel    | <b>0.5598</b> |
| TargetScan | 0.5478        |

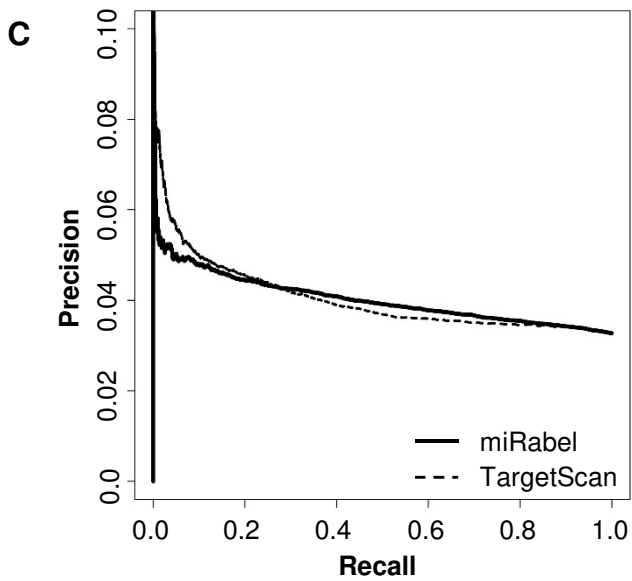

**D**

| PR_AUC     |               |
|------------|---------------|
| miRabel    | <b>0.0404</b> |
| TargetScan | 0.0406        |

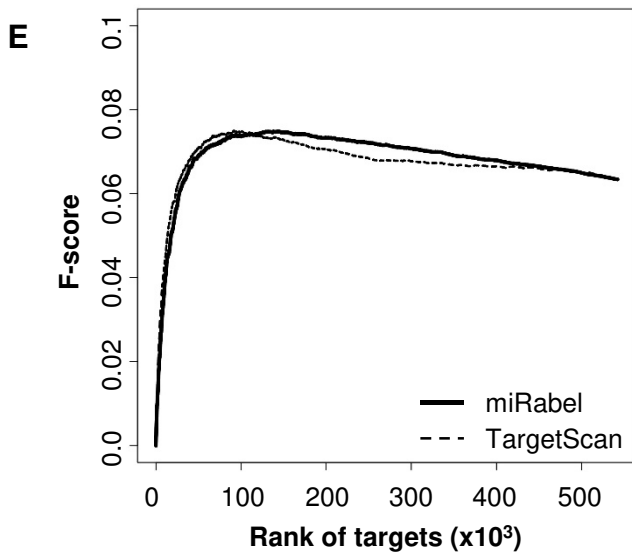

**F**

| Mean F-score         |               |               |
|----------------------|---------------|---------------|
| Top % of predictions | miRabel       | TargetScan    |
| 10%                  | 0.0528        | <b>0.0565</b> |
| 20%                  | 0.0627        | <b>0.0652</b> |
| 40%                  | 0.0684        | <b>0.0686</b> |
| 100%                 | <b>0.0684</b> | 0.0674        |

Figure 7
